# Supplementary material for: Moderate stability of a scissor double fluorescent triple helix molecular switch for the ultrasensitive biosensing of crop transgene
Source: Royal Society of Chemistry journal article supplement (doi:10.1039/d2nj00647b), 2022-01-01
Supplement: d2nj00647b1.pdf [file d2nj00647b1.pdf]

## Electronic Supplementary Information

belonging to the article

### **Moderate stability of scissor double fluorescent triple helix molecular switch for ultrasensitive Biosensing of crop transgene**

**Xiuling Chu,<sup>‡a</sup> Desong Zhu,<sup>‡\*b</sup> Min Liu,<sup>c</sup> Lingrang Kong,<sup>d</sup> and Shiyun Ai<sup>b</sup>**

*<sup>a</sup> Shandong Taian Ecological Environment Monitoring Center, Taian 271000, P. R. China.*

*<sup>b</sup> Key Laboratory of Agricultural Film Application of Ministry of Agriculture and Rural Affairs, College of Chemistry and Material Science, Shandong Agricultural University, Taian 271018, P. R. China.*

*<sup>c</sup>Shandong Qingdao Ecological Environment Monitoring Center, Qingdao 266000, P. R. China.*

*<sup>d</sup>State Key Laboratory of Crop Biology, College of Agronomy, Shandong Agricultural University, Taian 271000, P. R. China.*

Corresponding author:

E-mail: zhudesong@sdau.edu.cn; Fax: +86 538 8242251; Tel: +86 538 8241163.

## Results:

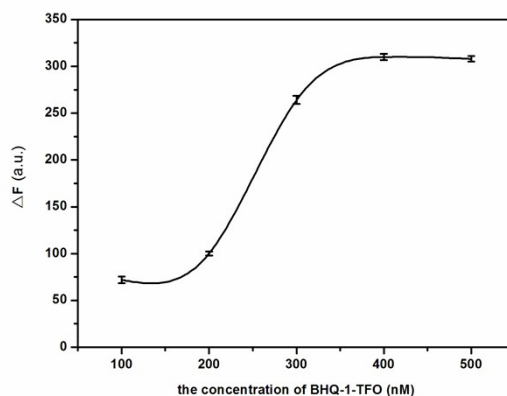

Fig. S1 The effect of BHQ-1-TFO concentration.

Experimental conditions: 10 mM HAc-Ac- buffer (pH 5.0), 300 mM NaNO<sub>3</sub>, 100 nM SB-3, (100-500) nM (BHQ-1-TFO-3)-3, 100 nM Bt gene, 1.5 h of self-assembly at 40 °C, 0.8 h of binding at 40 °C.

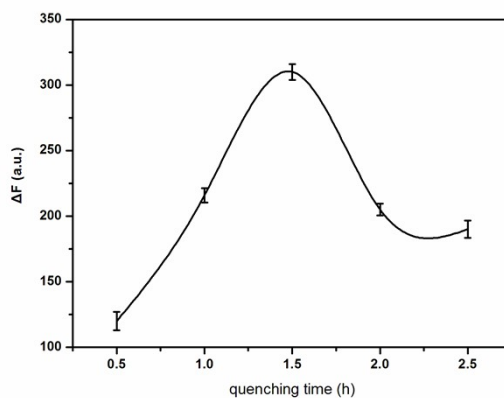

Fig. S2 The effect of quenching time.

Experimental conditions: 10 mM HAc-Ac- buffer (pH 5.0), 300 mM NaNO<sub>3</sub>, 100 nM SB-3, 400 nM (BHQ-1-TFO-3)-3, 100 nM Bt gene, (0.5-2.5) h of quenching at 40 °C, 0.8 h of binding at 40 °C.

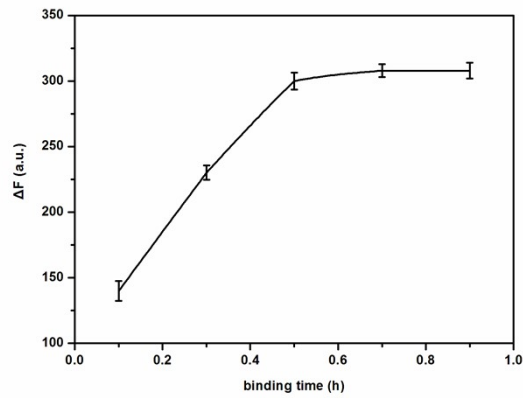

Fig. S3 The effect of binding time.

Experimental conditions: 10 mM HAc-Ac- buffer (pH 5.0), 300 mM NaNO<sub>3</sub>, 100 nM SB-3, 400 nM (BHQ-1-TFO-3)-3, 100 nM Bt gene, 1.5 h of self-assembly at 40 °C, (0.1-0.9) h of binding at 40 °C.

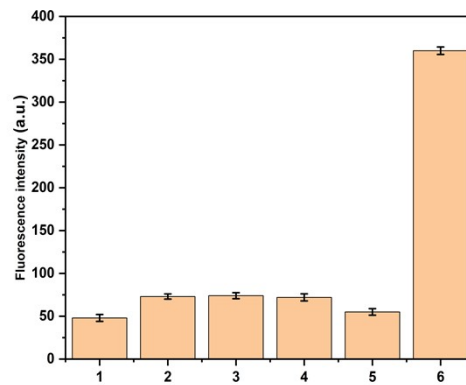

Fig. S4 The specificity of the proposed method.

(1) The control experiment without Bt gene (2) Single-base mismatched DNA (SM-DNA-1), (3) SM-DNA-2, (4) SM-DNA-3, (5) three-base mismatched DNA (TM-DNA), (6) Bt gene.

Experimental conditions: 10 mM HAc-Ac- buffer (pH 5.0), 300 mM NaNO<sub>3</sub>, 100 nM SB-3, 400 nM (BHQ-1-TFO-3)-3, 100 nM (single-base mismatched DNA, three-base mismatched DNA and Bt gene), 1.5 h of self-assembly at 40 °C, 0.8 h of binding at 40 °C.

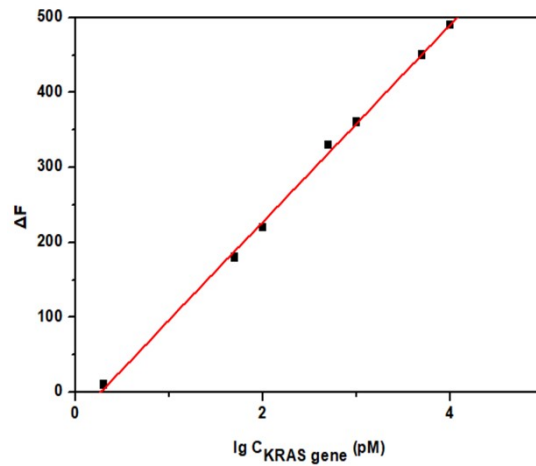

Fig. S5 The relationship between fluorescence intensity and the concentration of KRAS gene.

Experimental conditions: 10 mM HAc-Ac- buffer (pH 5.0), 300 mM of NaNO<sub>3</sub>, 100 nM SB-3, 400 nM (BHQ-1-TFO-2)-3, (2 pM to 10 nM) KRAS gene, 1.5 h of self-assembly at 40 °C, 0.8 h of binding at 40 °C. The error bars showed the standard deviation of three replicate determinations.

**Table S1.** Sequences of oligonucleotides in this study

| Name            | Sequences (5'-3')                                                                |
|-----------------|----------------------------------------------------------------------------------|
| SB-1            | <u>TTTTTTTTTTTTTTT</u> GAGGTGCTGCCGCTGCCGAAGTGCGCTGG<br>T <u>TTTTTTTTTTTTTTT</u> |
| SB-2            | <u>CCCCCCCCCCCCCCC</u> GAGGTGCTGCCGCTGCCGAAGTGCGCTG<br>GT <u>CCCCCCCCCCCCCCC</u> |
| SB-3            | <u>TCTCTCTCTCTCTC</u> GAGGTGCTGCCGCTGCCGAAGTGCGCTG<br>GT <u>TCTCTCTCTCTCTC</u>   |
| (BHQ-1-TFO-1)-1 | AAAAAA                                                                           |
| (BHQ-1-TFO-2)-1 | AAAAAAA                                                                          |
| (BHQ-1-TFO-3)-1 | AAAAAAAAA                                                                        |
| (BHQ-1-TFO-4)-1 | AAAAAAAAAAA                                                                      |
| (BHQ-1-TFO-5)-1 | AAAAAAAAAAAAA                                                                    |
| (BHQ-1-TFO-1)-2 | GGGGG                                                                            |
| (BHQ-1-TFO-2)-2 | GGGGGGG                                                                          |
| (BHQ-1-TFO-3)-2 | GGGGGGGGG                                                                        |
| (BHQ-1-TFO-4)-2 | GGGGGGGGGGG                                                                      |
| (BHQ-1-TFO-5)-2 | GGGGGGGGGGGGG                                                                    |
| (BHQ-1-TFO-1)-3 | AGAGAG                                                                           |
| (BHQ-1-TFO-2)-3 | AGAGAGAG                                                                         |
| (BHQ-1-TFO-3)-3 | AGAGAGAGAG                                                                       |
| (BHQ-1-TFO-4)-3 | AGAGAGAGAGAG                                                                     |
| (BHQ-1-TFO-5)-3 | AGAGAGAGAGAGAG                                                                   |
| Bt gene         | ACCAGCGCACTTCGGCAGCGGCAGCACCTC                                                   |
| SM-DNA-1        | ACCAGCC <u>C</u> ACTTCGGCAGCGGCAGCACCTC                                          |
| SM-DNA-2        | ACCAGCGCACTTCGGG <u>A</u> GCGGCAGCACCTC                                          |
| SM-DNA-3        | ACCAGCGCACTTCGGCAGCGGCAGCT <u>C</u> CTC                                          |
| TM-DNA          | ACCAGCC <u>C</u> ACTTCGGCT <u>G</u> CGGCAGCAC <u>G</u> TC                        |

T-MB            **TCTCTCTCTCGAGGTGCTGCCGCTGCCGAAGTGCCTGGT**  
**GAGAGAGAGA**

KRAS gene            AG CTG GTG GCG TAG GCA AGA G

---

(The underlined regions in SB (SB-1, SB-2 and SB-3) denote the two homopyrimidine strands at both ends (the components of the scissor DFTHMS). The italics areas regions in (SB-1, SB-2 and SB-3 as well as T-MB) denote the complementary sequences of Bt gene. The underlined regions in SM-DNA and TM-DNA denote the mismatched bases. The boldface regions in T-MB (traditional molecular beacon) denote the complementary sequence of the neck.
